# Supplementary material for: The Severity of COVID-19 Affects the Plasma Soluble Levels of the Immune Checkpoint HLA-G Molecule
Source: MDPI journal article supplement (doi:10.3390/ijms23179736), 2022-08-27
Supplement: s1 [file s1]

## *Supplementary Materials*

Original article: “Severity of covid-19 affects the plasma soluble levels of the immune checkpoint HLA-G molecule”

**Supplementary Table S1.** Characterization of participants according to signs and symptoms of covid-19.

| Participant's Classification | Symptoms, Signs, and Parameters                                                                                                                                                                                                                                                                                                                                                                                                                           |
|------------------------------|-----------------------------------------------------------------------------------------------------------------------------------------------------------------------------------------------------------------------------------------------------------------------------------------------------------------------------------------------------------------------------------------------------------------------------------------------------------|
| <b>Healthy Controls</b>      | <ul style="list-style-type: none"> <li>- Negative for SARS-Cov-2 nucleic acid</li> <li>- No clinical signs</li> </ul>                                                                                                                                                                                                                                                                                                                                     |
| <b>Mild</b>                  | <ul style="list-style-type: none"> <li>- Positive for SARS-Cov-2 nucleic acid and/or serological test</li> <li>- With or without the following symptoms: diarrhea, cough, fever, headache, loss of taste (ageusia) / smell (anosmia), myalgia, nausea, and vomiting</li> <li>- Oxygen saturation 94-99 % on room air</li> </ul>                                                                                                                           |
| <b>Moderate</b>              | <ul style="list-style-type: none"> <li>- Positive for SARS-Cov-2 nucleic acid and/or serological test</li> <li>- Manifestation of mild disease symptoms including dyspnea</li> <li>- Oxygen saturation <math>\geq 93\%</math> on room air and PaO<sub>2</sub>/FiO<sub>2</sub> 250-300 mmHg</li> <li>- Do not need invasive ventilation: nasal catheter (oxygen 2-4 L/min) or oxygen reservoir (oxygen 4-12 L/min)</li> </ul>                              |
| <b>Severe</b>                | <ul style="list-style-type: none"> <li>- Positive for SARS-Cov-2 nucleic acid and/or serological test</li> <li>- Possible admission to intensive care units</li> <li>- Severe respiratory distress</li> <li>- Oxygen saturation <math>&lt; 93\%</math> on room air and PaO<sub>2</sub>/FiO<sub>2</sub> <math>&lt; 250</math> mmHg</li> <li>- Need non-invasive ventilation: oxygen reservoir or non-rebreathing face mask (oxygen 10-15 L/min)</li> </ul> |
| <b>Critical</b>              | <ul style="list-style-type: none"> <li>- Positive for SARS-Cov-2 nucleic acid and/or serological test</li> <li>- Admission to intensive care units</li> <li>- Acute respiratory distress syndrome</li> <li>- Need invasive ventilation</li> <li>- PaO<sub>2</sub>/FiO<sub>2</sub> <math>&lt; 200</math> mmHg</li> <li>- With or without one or more additional parameters: need hemodialysis, sepsis, septic shock, and multiorgan dysfunction</li> </ul> |

The participants were classified into five clinical groups, established by symptoms severity, clinical parameters, patient management, and laboratory findings, following the WHO recommendations) [1–8]. Abbreviations: FiO<sub>2</sub>: fraction of inspired oxygen; PaO<sub>2</sub>: partial pressure of oxygen.

**Supplementary Table S2.** Information about  $r$  and  $p$ -values of the correlation matrix shown in Figure 5.

| Comparison | Row                    | Column | Correlation | $p$ -Value  |
|------------|------------------------|--------|-------------|-------------|
| 1          | BMI                    | Age    | 0,1229      | 0,062855932 |
| 2          | Infection days         | Age    | 0,3824      | 1,49738E-07 |
| 3          | Days hospitalized      | Age    | 0,6205      | 7,93271E-27 |
| 4          | Clinical Score         | Age    | 0,6486      | 6,46492E-30 |
| 5          | O <sub>2</sub> Infused | Age    | 0,6685      | 8,43837E-32 |
| 6          | INR                    | Age    | 0,0087      | 0,902143302 |
| 7          | Total Leukocytes       | Age    | 0,2334      | 0,00027325  |
| 8          | Neutrophil             | Age    | 0,5899      | 8,43501E-24 |
| 9          | Lymphocyte             | Age    | -0,6383     | 9,48496E-29 |
| 10         | NLR                    | Age    | 0,6103      | 1,39724E-25 |
| 11         | Glycemia               | Age    | 0,5144      | 1,6348E-15  |
| 12         | C-reactive protein     | Age    | 0,0326      | 0,765920878 |
| 13         | IL-12                  | Age    | 0,0422      | 0,520128895 |
| 14         | TNF                    | Age    | 0,0732      | 0,263718758 |
| 15         | IL-10                  | Age    | 0,5077      | 8,41774E-17 |
| 16         | IL-6                   | Age    | 0,6357      | 5,23447E-28 |
| 17         | IL-1 $\beta$           | Age    | 0,1251      | 0,055426557 |
| 18         | IL-8                   | Age    | 0,6660      | 2,43062E-30 |
| 19         | sHLA-G                 | Age    | 0,2615      | 4,24493E-05 |
| 20         | Infection days         | BMI    | 0,0867      | 0,259296489 |
| 21         | Days hospitalized      | BMI    | 0,1950      | 0,002972993 |
| 22         | Clinical score         | BMI    | 0,2937      | 5,89609E-06 |
| 23         | O <sub>2</sub> Infused | BMI    | 0,2307      | 0,00045931  |
| 24         | INR                    | BMI    | -0,1970     | 0,005647958 |
| 25         | Total leukocytes       | BMI    | 0,0986      | 0,136112741 |
| 26         | Neutrophil             | BMI    | 0,0958      | 0,147436719 |
| 27         | Lymphocyte             | BMI    | -0,0964     | 0,144882031 |
| 28         | NLR                    | BMI    | 0,1014      | 0,126970629 |
| 29         | Glycemia               | BMI    | 0,2232      | 0,001367423 |
| 30         | C-reactive protein     | BMI    | 0,0052      | 0,963785371 |
| 31         | IL-12                  | BMI    | -0,0510     | 0,442356983 |
| 32         | TNF                    | BMI    | 0,0133      | 0,841927868 |
| 33         | IL-10                  | BMI    | 0,1473      | 0,025766699 |
| 34         | IL-6                   | BMI    | 0,2660      | 4,5779E-05  |
| 35         | IL-1 $\beta$           | BMI    | -0,0518     | 0,435542815 |
| 36         | IL-8                   | BMI    | 0,2537      | 0,000137172 |
| 37         | sHLA-G                 | BMI    | 0,1457      | 0,027120788 |

|    |                        |                   |         |             |
|----|------------------------|-------------------|---------|-------------|
| 38 | Days hospitalized      | Infection days    | 0,4269  | 3,11116E-09 |
| 39 | Clinical score         | Infection days    | 0,4186  | 6,70519E-09 |
| 40 | O <sub>2</sub> Infused | Infection days    | 0,4437  | 7,7815E-10  |
| 41 | INR                    | Infection days    | -0,1388 | 0,094785377 |
| 42 | Total leukocytes       | Infection days    | 0,1437  | 0,056398953 |
| 43 | Neutrophil             | Infection days    | 0,3700  | 4,02054E-07 |
| 44 | Lymphocyte             | Infection days    | -0,3960 | 4,87316E-08 |
| 45 | NLR                    | Infection days    | 0,3955  | 6,06602E-08 |
| 46 | Glycemia               | Infection days    | 0,3202  | 4,58944E-05 |
| 47 | C-reactive protein     | Infection days    | -0,0312 | 0,790647466 |
| 48 | IL-12                  | Infection days    | 0,0470  | 0,539465841 |
| 49 | TNF                    | Infection days    | 0,0315  | 0,681237279 |
| 50 | IL-10                  | Infection days    | 0,3019  | 5,40977E-05 |
| 51 | IL-6                   | Infection days    | 0,3915  | 9,98929E-08 |
| 52 | IL-1 $\beta$           | Infection days    | -0,0360 | 0,638578874 |
| 53 | IL-8                   | Infection days    | 0,4385  | 3,07714E-09 |
| 54 | sHLA-G                 | Infection days    | 0,0486  | 0,520906168 |
| 55 | Clinical score         | Days hospitalized | 0,8284  | 1,37099E-61 |
| 56 | O <sub>2</sub> Infused | Days hospitalized | 0,8899  | 2,09201E-81 |
| 57 | INR                    | Days hospitalized | -0,1148 | 0,102931162 |
| 58 | Total leukocytes       | Days hospitalized | 0,3299  | 1,79243E-07 |
| 59 | Neutrophil             | Days hospitalized | 0,7284  | 8,48898E-41 |
| 60 | Lymphocyte             | Days hospitalized | -0,7546 | 2,99013E-45 |
| 61 | NLR                    | Days hospitalized | 0,7416  | 1,27993E-42 |
| 62 | Glycemia               | Days hospitalized | 0,5581  | 1,64134E-18 |
| 63 | C-reactive protein     | Days hospitalized | 0,1744  | 0,108307138 |
| 64 | IL-12                  | Days hospitalized | 0,0862  | 0,187684382 |
| 65 | TNF                    | Days hospitalized | 0,1065  | 0,103261363 |
| 66 | IL-10                  | Days hospitalized | 0,6209  | 1,90259E-26 |
| 67 | IL-6                   | Days hospitalized | 0,7252  | 1,21913E-39 |
| 68 | IL-1 $\beta$           | Days hospitalized | 0,1462  | 0,025026763 |
| 69 | IL-8                   | Days hospitalized | 0,6795  | 5,86835E-32 |
| 70 | sHLA-G                 | Days hospitalized | 0,2289  | 0,000359545 |
| 71 | O <sub>2</sub> Infused | Clinical Score    | 0,8958  | 5,20703E-84 |
| 72 | INR                    | Clinical Score    | -0,1057 | 0,133381204 |
| 73 | Total leukocytes       | Clinical Score    | 0,3488  | 3,04232E-08 |
| 74 | Neutrophil             | Clinical Score    | 0,7023  | 7,75194E-37 |
| 75 | Lymphocyte             | Clinical Score    | -0,7328 | 1,6728E-41  |
| 76 | NLR                    | Clinical Score    | 0,7206  | 3,0273E-39  |
| 77 | Glycemia               | Clinical Score    | 0,6019  | 5,50832E-22 |

|     |                    |                        |         |             |
|-----|--------------------|------------------------|---------|-------------|
| 78  | C-reactive protein | Clinical Score         | 0,3417  | 0,001284096 |
| 79  | IL-12              | Clinical Score         | 0,0848  | 0,195031019 |
| 80  | TNF                | Clinical Score         | 0,0916  | 0,161389944 |
| 81  | IL-10              | Clinical Score         | 0,6189  | 3,1064E-26  |
| 82  | IL-6               | Clinical Score         | 0,7849  | 2,44276E-50 |
| 83  | IL-1 $\beta$       | Clinical Score         | 0,1547  | 0,017625184 |
| 84  | IL-8               | Clinical Score         | 0,7508  | 3,21646E-42 |
| 85  | sHLA-G             | Clinical Score         | 0,3801  | 1,24206E-09 |
| 86  | INR                | O <sub>2</sub> Infused | -0,0692 | 0,330157046 |
| 87  | Total leukocytes   | O <sub>2</sub> Infused | 0,3101  | 1,24549E-06 |
| 88  | Neutrophil         | O <sub>2</sub> Infused | 0,7263  | 8,4057E-40  |
| 89  | Lymphocyte         | O <sub>2</sub> Infused | -0,7658 | 1,40816E-46 |
| 90  | NLR                | O <sub>2</sub> Infused | 0,7526  | 8,44528E-44 |
| 91  | Glycemia           | O <sub>2</sub> Infused | 0,5628  | 8,88037E-19 |
| 92  | C-reactive protein | O <sub>2</sub> Infused | 0,5057  | 1,26246E-06 |
| 93  | IL-12              | O <sub>2</sub> Infused | 0,1148  | 0,081620195 |
| 94  | TNF                | O <sub>2</sub> Infused | 0,1296  | 0,049139116 |
| 95  | IL-10              | O <sub>2</sub> Infused | 0,6146  | 2,18168E-25 |
| 96  | IL-6               | O <sub>2</sub> Infused | 0,8028  | 2,51121E-53 |
| 97  | IL-1 $\beta$       | O <sub>2</sub> Infused | 0,1487  | 0,023807786 |
| 98  | IL-8               | O <sub>2</sub> Infused | 0,7312  | 1,43461E-38 |
| 99  | sHLA-G             | O <sub>2</sub> Infused | 0,2659  | 3,65033E-05 |
| 100 | Total leukocytes   | INR                    | 0,1034  | 0,142061447 |
| 101 | Neutrophil         | INR                    | -0,0610 | 0,387615727 |
| 102 | Lymphocyte         | INR                    | 0,0581  | 0,410446198 |
| 103 | NLR                | INR                    | -0,0878 | 0,215414212 |
| 104 | Glycemia           | INR                    | -0,1535 | 0,036456594 |
| 105 | C-reactive protein | INR                    | 0,4793  | 6,14488E-05 |
| 106 | IL-12              | INR                    | 0,0426  | 0,548836851 |
| 107 | TNF                | INR                    | -0,0800 | 0,260134709 |
| 108 | IL-10              | INR                    | -0,0660 | 0,35342934  |
| 109 | IL-6               | INR                    | -0,0177 | 0,803868742 |
| 110 | IL-1 $\beta$       | INR                    | 0,0648  | 0,362197673 |
| 111 | IL-8               | INR                    | -0,0116 | 0,872812168 |
| 112 | sHLA-G             | INR                    | 0,0475  | 0,500543622 |
| 113 | Neutrophil         | Total Leukocytes       | 0,4468  | 3,95787E-13 |
| 114 | Lymphocyte         | Total Leukocytes       | -0,4811 | 2,99472E-15 |
| 115 | NLR                | Total Leukocytes       | 0,4461  | 5,44968E-13 |
| 116 | Glycemia           | Total Leukocytes       | 0,2892  | 2,1734E-05  |

|     |                    |                  |         |             |
|-----|--------------------|------------------|---------|-------------|
| 117 | C-reactive protein | Total Leukocytes | 0,1371  | 0,208093877 |
| 118 | IL-12              | Total Leukocytes | -0,0709 | 0,279050243 |
| 119 | TNF                | Total Leukocytes | 0,1482  | 0,023069673 |
| 120 | IL-10              | Total Leukocytes | 0,2205  | 0,000662591 |
| 121 | IL-6               | Total Leukocytes | 0,2885  | 6,95599E-06 |
| 122 | IL-1 $\beta$       | Total Leukocytes | 0,1514  | 0,020268537 |
| 123 | IL-8               | Total Leukocytes | 0,2319  | 0,000440509 |
| 124 | sHLA-G             | Total Leukocytes | 0,1444  | 0,02563749  |
| 125 | Lymphocyte         | Neutrophil       | -0,9642 | 1,2811E-138 |
| 126 | NLR                | Neutrophil       | 0,9549  | 5,9644E-126 |
| 127 | Glycemia           | Neutrophil       | 0,4890  | 5,81368E-14 |
| 128 | C-reactive protein | Neutrophil       | 0,1643  | 0,130641111 |
| 129 | IL-12              | Neutrophil       | -0,0106 | 0,87218733  |
| 130 | TNF                | Neutrophil       | 0,1251  | 0,055454834 |
| 131 | IL-10              | Neutrophil       | 0,5767  | 3,11323E-22 |
| 132 | IL-6               | Neutrophil       | 0,6314  | 1,51659E-27 |
| 133 | IL-1 $\beta$       | Neutrophil       | 0,1265  | 0,052814858 |
| 134 | IL-8               | Neutrophil       | 0,5813  | 8,01876E-22 |
| 135 | sHLA-G             | Neutrophil       | 0,1661  | 0,010120135 |
| 136 | NLR                | Lymphocyte       | -0,9738 | 3,4336E-153 |
| 137 | Glycemia           | Lymphocyte       | -0,5139 | 1,75934E-15 |
| 138 | C-reactive protein | Lymphocyte       | -0,2386 | 0,026972849 |
| 139 | IL-12              | Lymphocyte       | -0,0071 | 0,913278078 |
| 140 | TNF                | Lymphocyte       | -0,1157 | 0,076753975 |
| 141 | IL-10              | Lymphocyte       | -0,5943 | 7,90334E-24 |
| 142 | IL-6               | Lymphocyte       | -0,6721 | 3,00596E-32 |
| 143 | IL-1 $\beta$       | Lymphocyte       | -0,1189 | 0,068788659 |
| 144 | IL-8               | Lymphocyte       | -0,6196 | 2,37188E-25 |
| 145 | sHLA-G             | Lymphocyte       | -0,1661 | 0,01011719  |
| 146 | Glycemia           | NLR              | 0,5149  | 2,07594E-15 |
| 147 | C-reactive protein | NLR              | 0,2148  | 0,048397943 |
| 148 | IL-12              | NLR              | 0,0055  | 0,933194961 |
| 149 | TNF                | NLR              | 0,0840  | 0,201277701 |
| 150 | IL-10              | NLR              | 0,5791  | 2,87651E-22 |
| 151 | IL-6               | NLR              | 0,6580  | 2,74221E-30 |
| 152 | IL-1 $\beta$       | NLR              | 0,1062  | 0,105777999 |
| 153 | IL-8               | NLR              | 0,6037  | 1,24603E-23 |
| 154 | sHLA-G             | NLR              | 0,1654  | 0,010738278 |
| 155 | C-reactive protein | Glycemia         | -0,0877 | 0,501403057 |
| 156 | IL-12              | Glycemia         | -0,0365 | 0,60238259  |
| 157 | TNF                | Glycemia         | 0,0138  | 0,843661268 |

|     |              |                    |         |             |
|-----|--------------|--------------------|---------|-------------|
| 158 | IL-10        | Glycemia           | 0,4252  | 1,89194E-10 |
| 159 | IL-6         | Glycemia           | 0,4920  | 5,86556E-14 |
| 160 | IL-1 $\beta$ | Glycemia           | 0,0421  | 0,547920542 |
| 161 | IL-8         | Glycemia           | 0,5279  | 9,50264E-16 |
| 162 | sHLA-G       | Glycemia           | 0,2593  | 0,00014993  |
| 163 | IL-12        | C-reactive protein | 0,1368  | 0,217327087 |
| 164 | TNF          | C-reactive protein | 0,1449  | 0,19135936  |
| 165 | IL-10        | C-reactive protein | 0,0860  | 0,439439536 |
| 166 | IL-6         | C-reactive protein | 0,3899  | 0,000269159 |
| 167 | IL-1 $\beta$ | C-reactive protein | 0,1651  | 0,135706968 |
| 168 | IL-8         | C-reactive protein | 0,2082  | 0,071061249 |
| 169 | sHLA-G       | C-reactive protein | 0,1884  | 0,082334118 |
| 170 | TNF          | IL-12              | 0,3761  | 2,61016E-09 |
| 171 | IL-10        | IL-12              | 0,1145  | 0,079962887 |
| 172 | IL-6         | IL-12              | 0,0619  | 0,34452535  |
| 173 | IL-1 $\beta$ | IL-12              | 0,3053  | 1,84856E-06 |
| 174 | IL-8         | IL-12              | 0,0364  | 0,585993827 |
| 175 | sHLA-G       | IL-12              | -0,0168 | 0,798041195 |
| 176 | IL-10        | TNF                | 0,1921  | 0,003116923 |
| 177 | IL-6         | TNF                | 0,0582  | 0,374677003 |
| 178 | IL-1 $\beta$ | TNF                | 0,3315  | 1,95846E-07 |
| 179 | IL-8         | TNF                | 0,0446  | 0,504472816 |
| 180 | sHLA-G       | TNF                | -0,1207 | 0,064617776 |
| 181 | IL-6         | IL-10              | 0,6873  | 3,35789E-34 |
| 182 | IL-1 $\beta$ | IL-10              | 0,1239  | 0,057910603 |
| 183 | IL-8         | IL-10              | 0,7639  | 1,72124E-44 |
| 184 | sHLA-G       | IL-10              | 0,2825  | 1,09839E-05 |
| 185 | IL-1 $\beta$ | IL-6               | 0,1872  | 0,003986332 |
| 186 | IL-8         | IL-6               | 0,7755  | 1,25921E-46 |
| 187 | sHLA-G       | IL-6               | 0,3048  | 1,91881E-06 |
| 188 | IL-8         | IL-1 $\beta$       | 0,0862  | 0,196647333 |
| 189 | sHLA-G       | IL-1 $\beta$       | 0,0202  | 0,758516596 |
| 190 | sHLA-G       | IL-8               | 0,3633  | 1,85843E-08 |

**Supplementary Table S3.** Binomial logistic regression coefficient model under collinearity \* for severity and outcome of mortality in the study.

| Predictor                         | Estimate | SE      | Z      | p      | Odds ratio | 95% Confidence Interval |         | VIF  | Tolerance |
|-----------------------------------|----------|---------|--------|--------|------------|-------------------------|---------|------|-----------|
|                                   |          |         |        |        |            | Lower                   | Upper   |      |           |
| Severity                          |          |         |        |        |            |                         |         |      |           |
| Intercept                         | -5.97374 | 0.96339 | -6.201 | < .001 | 0.00254    | 3.85e-4                 | 0.0168  | -    | -         |
| sHLA-G                            | 9.56e-4  | 0.00287 | 0.333  | 0.739  | 1.00096    | 0.995                   | 1.0066  | 1.04 | 0.959     |
| NLR                               | 0.09505  | 0.05408 | 1.758  | 0.079  | 1.09972    | 0.989                   | 1.2227  | 1.32 | 0.757     |
| Days hospitalized                 | 0.15963  | 0.04505 | 3.544  | < .001 | 1.17308    | 1.074                   | 1.2814  | 1.23 | 0.812     |
| Glycemia                          | 0.00910  | 0.00374 | 2.434  | 0.015  | 1.00914    | 1.002                   | 1.0166  | 1.17 | 0.852     |
| Comorbidities (present vs absent) | 0.74200  | 0.52025 | 1.426  | 0.154  | 2.10013    | 0.758                   | 5.8222  | 1.21 | 0.828     |
| Sex (male vs female)              | 0.06467  | 0.48519 | 0.133  | 0.894  | 1.06680    | 0.412                   | 2.7611  | 1.09 | 0.919     |
| Age, over 60 years                | 0.04169  | 0.01465 | 2.847  | 0.004  | 1.04257    | 1.013                   | 1.0729  | 1.21 | 0.823     |
| Outcome of Mortality              |          |         |        |        |            |                         |         |      |           |
| Intercept                         | -7.48800 | 1.19692 | -6.256 | < .001 | 5.60e-4    | 5.36e-5                 | 0.00585 | -    | -         |
| sHLA-G                            | 0.00585  | 0.00241 | 2.427  | 0.015  | 1.006      | 1.001                   | 1.01062 | 1.03 | 0.966     |
| NLR                               | 0.01114  | 0.01699 | 0.656  | 0.512  | 1.011      | 0.978                   | 1.04545 | 1.12 | 0.890     |
| Days hospitalized                 | 0.13411  | 0.03546 | 3.782  | < .001 | 1.144      | 1.067                   | 1.22583 | 1.13 | 0.887     |
| Glycemia                          | -0.00106 | 0.00392 | -0.271 | 0.786  | 0.999      | 0.991                   | 1.00665 | 1.22 | 0.820     |
| Comorbidities (present vs absent) | -0.36565 | 0.58462 | -0.625 | 0.532  | 0.694      | 0.221                   | 2.18188 | 1.31 | 0.764     |
| Sex (male vs female)              | 0.53415  | 0.49318 | 1.083  | 0.279  | 1.706      | 0.649                   | 4.48511 | 1.05 | 0.956     |
| Age, over 60 years                | 0.08135  | 0.01671 | 4.869  | < .001 | 1.085      | 1.050                   | 1.12086 | 1.22 | 0.821     |

vs: versus; RNL: neutrophil–lymphocyte ratio.

## References

1. Grasselli, G.; Zangrillo, A.; Zanella, A.; Antonelli, M.; Cabrini, L.; Castelli, A.; Cereda, D.; Coluccello, A.; Foti, G.; Fumagalli, R.; et al. Baseline Characteristics and Outcomes of 1591 Patients Infected with SARS-CoV-2 Admitted to ICUs of the Lombardy Region, Italy. *JAMA - Journal of the American Medical Association* **2020**, *323*, 1574–1581, doi:10.1001/jama.2020.5394.
2. Hadjadj, J.; Yatim, N.; Barnabei, L.; Corneau, A.; Boussier, J.; Smith, N.; Péré, H.; Charbit, B.; Bondet, V.; Chenevier-Gobeaux, C.; et al. Impaired Type I Interferon Activity and Inflammatory Responses in Severe COVID-19 Patients. *Science (1979)* **2020**, *369*, doi:10.1126/science.abc6027.
3. Marshall, J.C.; Murthy, S.; Diaz, J.; Adhikari, N.; Angus, D.C.; Arabi, Y.M.; Baillie, K.; Bauer, M.; Berry, S.; Blackwood, B.; et al. A Minimal Common Outcome Measure Set for COVID-19 Clinical Research. *The Lancet Infectious Diseases* **2020**, *20*.
4. Xu, X.W.; Wu, X.X.; Jiang, X.G.; Xu, K.J.; Ying, L.J.; Ma, C.L.; Li, S.B.; Wang, H.Y.; Zhang, S.; Gao, H.N.; et al. Clinical Findings in a Group of Patients Infected with the 2019 Novel Coronavirus (SARS-Cov-2) Outside of Wuhan, China: Retrospective Case Series. *The BMJ* **2020**, *368*, doi:10.1136/bmj.m606.
5. Ye, G.; Pan, Z.; Pan, Y.; Deng, Q.; Chen, L.; Li, J.; Li, Y.; Wang, X. Clinical Characteristics of Severe Acute Respiratory Syndrome Coronavirus 2 Reactivation. *Journal of Infection* **2020**, *80*, doi:10.1016/j.jinf.2020.03.001.
6. Office, W.H.O.E.M.R. Updated Clinical Management Guideline for COVID-19. *Weekly Epidemiology Monitor* **2020**, *13*.
7. Wei, P.-F. Diagnosis and Treatment Protocol for Novel Coronavirus Pneumonia (Trial Version 7). *Chinese Medical Journal* **2020**, *133*, 1087–1095, doi:10.1097/CM9.0000000000000819.
8. Wan, S.; Xiang, Y.; Fang, W.; Zheng, Y.; Li, B.; Hu, Y.; Lang, C.; Huang, D.; Sun, Q.; Xiong, Y.; et al. Clinical Features and Treatment of COVID-19 Patients in Northeast Chongqing. *Journal of Medical Virology* **2020**, *92*, 797–806, doi:10.1002/jmv.25783.
